# The Residents' JOURNAL

Last Issue's

## Table of Contents

- 1 The Science in Psychiatry: Integrating Neuroscience  
Kayla Pope, M.D., J.D.
- 2 The Role of the American Psychiatric Association in Integrating Neuroscience Into Psychiatry Training and Practice  
Kayla Pope, M.D., J.D.
- 3 Teaching Neuroscience to Psychiatry Residents: The National Institute of Mental Health Initiative  
Kayla Pope, M.D., J.D.
- 4 Neuroscience in the Psychiatry Curriculum: What, Why, and How Much?  
Anna Yusim, M.D.
- 6 Vermont Center for Children, Youth, and Families Tele-Education Program in Neuroscience and Genomics for Fellows in Child and Adolescent Psychiatry  
Jeremiah Dickerson, M.D.
- 8 Neuroscience and Psychiatry: The ACGME Perspective  
Carla Marienfeld, M.D.

The Residents' Journal is sent free-of-charge to all psychiatry residents. Anyone interested in being included on the distribution list should contact Angela Moore, the Residents' Journal staff editor at [ajp@psych.org](mailto:ajp@psych.org) with "Subscribe to Residents' Journal" in the subject line.

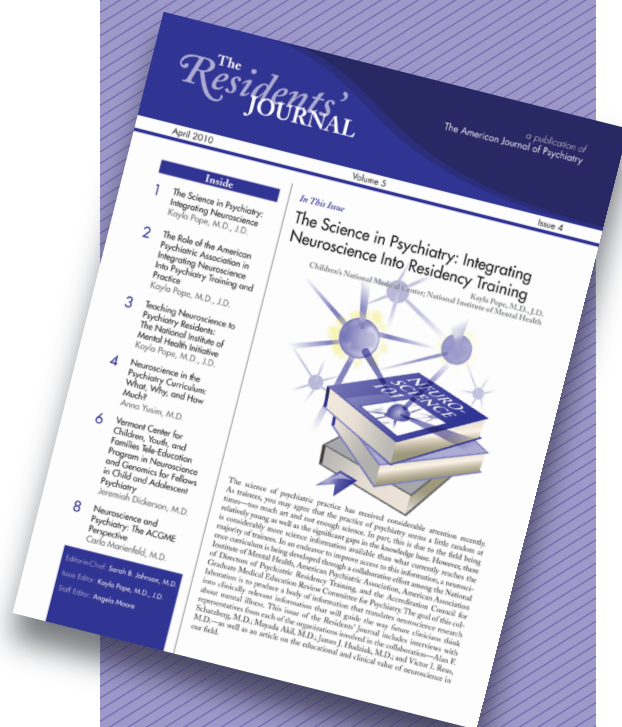

a publication of  
The American Journal of Psychiatry

# READ The American Journal of PSYCHIATRY ONLINE

## ONLINE BENEFITS

### AJP in Advance

Receive key research articles posted on the AJP website well in advance of their appearance in print.

### Back Issue Access

Gain access to back issues starting with Volume 1, Issue 1 of the American Journal of Insanity in 1844. (Available to institutions as a separate one-time purchase.)

### AJP CME

Take interactive quizzes that offer AMA PRA Category 1 Credits™ for selected articles from each issue (with paid subscription to the CME Course Program).

### AJP Audio

Listen to MP3-format program summarizing findings from key articles from each issue.

### Residents' Journal

Read additional AJP articles and features that have most value to residents in their training.

### Powerful Searching

Search by author, keyword, and/or citation details—within any one journal, across the entire PsychiatryOnline journal collection, or across all HighWire journals.

### PubMed, CrossRef, and Google Scholar links

Explore everything from cited references to abstracts and full text; to similar articles; to other articles by the same lead authors.

### eTOCs

Get advanced email alerts with the table of contents of the latest issue.

ACTIVATE NOW!

IT'S AS EASY AS...

2 Under SUBSCRIBE NOW, click "Activate Your Online Access"

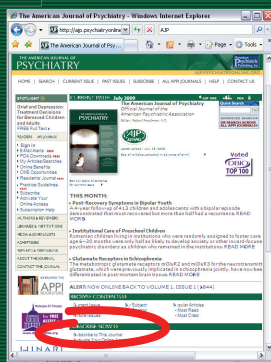

Go to [ajp.psychiatryonline.org](http://ajp.psychiatryonline.org)

3 Enter your APA Member Number. (This can be found on your mailing label.)

AJP 3000056866 CAR-RT LOT88 C-105

John Q Sample  
Mental Health Professional  
1000 Wilson Blvd STE 1825  
Arlington VA 22209-3924 01654

\*In most cases the number on your label will be your Member Number; if it is not, enter your APA Member Number (with enough leading zeros to create 10 digits).

For more information or if you cannot locate your customer number, please contact APPI Customer Service:

1.800.368.5777  
APPI@PSYCH.ORG

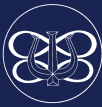

# Psychiatry and Clinical Neurosciences

**Edited by:** Masatoshi Takeda and Hiroshi Kurita | **Frequency:** Bi-monthly | **Impact Factor:** 1.394\*

\*Thomson Reuters Journal Citation Reports, 2008, Science Edition®

**Volume 64 Number 2, April 2010**

## Regular Articles

- 111 Relationship of alexithymia and temperament and character dimensions with lifetime post-traumatic stress disorder in male alcohol-dependent inpatients  
C. Evren, E. Dalbudak, R. Cetin, M. Durkaya and B. Evren
- 120 Factors associated with postpartum depression and abusive behavior in mothers with infants  
H. Choi, T. Yamashita, Y. Wada, J. Narumoto, H. Nanri, A. Fujimori, H. Yamamoto, S. Nishizawa, D. Masaki and K. Fukui
- 128 Randomized, single-blind, trial of sertraline and buspirone for treatment of elderly patients with generalized anxiety disorder  
N. Mokhber, M. R. Azarpazhooh, M. Khajehdaluae, A. Velayati and M. Hopwood
- 134 Clinical utility of the Chinese version of the Pediatric Daytime Sleepiness Scale in children with obstructive sleep apnea syndrome and narcolepsy  
C-M. Yang, Y-S. Huang and Y-C. Song
- 141 Characteristics of the tree-drawing test in chronic schizophrenia  
A. Kaneda, N. Yasui-Furukori, M. Saito, N. Sugawara, T. Nakagami, H. Furukori and S. Kaneko
- 149 Peritraumatic Distress Inventory as a predictor of post-traumatic stress disorder after a severe motor vehicle accident  
D. Nishi, Y. Matsuoka, N. Yonemoto, H. Noguchi, Y. Kim and S. Kanba
- 157 Regional cerebral blood flow changes in female to male gender identity disorder  
H. Nawata, K. Ogomori, M. Tanaka, R. Nishimura, H. Urashima, R. Yano, K. Takano and Y. Kuwabara
- 162 A single-blind, comparative study of zotepine versus haloperidol in combination with a mood stabilizer for patients with moderate-to-severe mania  
H-Y. Chan, S-H. Jou, Y-Y. Juang, C-J. Chang, J-J. Chen, C-H. Chen and N-Y. Chiu
- 170 The prevalence of restless legs syndrome in Taiwanese adults  
N-H. Chen, L-P. Chuang, C-T. Yang, C. A. Kushida, S-C. Hsu, P-C. Wang, S-W. Lin, Y-T. Chou, R-S. Chen, H-Y. Li and S-C. Lai
- 179 Predictors of antidepressant adherence: Results of a Japanese Internet-based survey  
J. Shigemura, T. Ogawa, A. Yoshino, Y. Sato and S. Nomura
- 187 Clinical efficacy of individual cognitive behavior therapy for psychophysiological insomnia in 20 outpatients  
M. Sato, W. Yamadera, M. Matsushima, H. Itoh and K. Nakayama

## Short Communications

- 196 No association between polymorphism in tyrosine hydroxylase and personality traits in healthy Japanese subjects  
S. Tsuchimine, N. Yasui-Furukori, A. Kaneda, M. Saito, T. Nakagami, N. Sugawara and S. Kaneko
- 199 Attitudes of early-career psychiatrists in Japan toward child and adolescent psychiatry and their career decision  
M. Tateno, T. Kato, W. Nakano, A. R. Teo, A. Nakagawa, K. Miyajima, S. Kanba, J. Nakamura and T. Saito
- 202 Rapid response to antipsychotic treatment on psychotic prodrome: Implications from a case series  
C-C. Liu, Y-H. Sheu, S-Y. Wu, M-C. Lai and H-G. Hwu
- 207 Pilot study of pharmacological treatment for frontotemporal dementia: Effect of Yokukansan on behavioral symptoms  
T. Kimura, H. Hayashida, H. Furukawa and J. Takamatsu

## Letters to the Editor

- 211  
216 Erratum

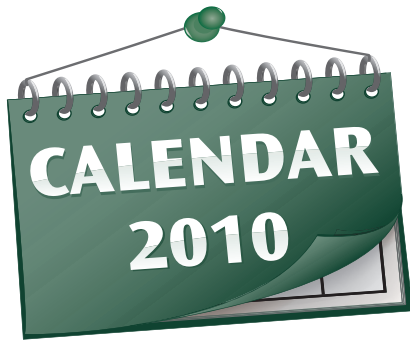

For free listing of your organization's official annual or regional meeting, please send us the following information: sponsor, location, inclusive dates, type and number of continuing education credits (if available), and the name, address, and telephone number of the person or group to contact for more information. In order for an event to appear in our listing, all notices and changes must be received at least 6 months in advance of the meeting and should be addressed to:

**Calendar, American Journal of Psychiatry, 1000 Wilson Boulevard, Suite 1825, Arlington, VA 22209-3901, [jblair@psych.org](mailto:jblair@psych.org) (e-mail).**

*Because of space limitations, only listings of meetings of the greatest interest to Journal readers will be included.*

---

## MAY

**May 20–22**, 54th Annual Meeting of the American Academy of Psychoanalysis and Dynamic Psychiatry, New Orleans, LA. Contact: Executive Office, American Adademy of Psychoanalysis and Dynamic Psychiatry, PO Box 30, Bloomfield, CT 06002; (888) 691-8281, (860) 286-0787, [info@aapdp.org](mailto:info@aapdp.org) (e-mail), [www.aapdp.org](http://www.aapdp.org) (web site).

**May 22–26**, 163rd Annual Meeting of the American Psychiatric Association, New Orleans, LA. Contact: Cathy Nash, APA Annual Meetings Dept., 1000 Wilson Blvd., Ste. 1825, Arlington, VA 22209; (703) 907-7822.

---

## JULY

**July 1–3**, 1st International Congress on Borderline Personality Disorder, Berlin Germany. Contact: Thorsten Kienast, MD, [thorsten.kienast@charite.de](mailto:thorsten.kienast@charite.de) (e-mail) 011-49-(0)30-2311 2928 (tel), [www.borderline-congress-org](http://www.borderline-congress-org) (web site).

---

## SEPTEMBER

**September 14–19**, 1st joint annual meeting of the EEG and Clinical Neuroscience Society (ECNS), International Society for Neuroimaging in Psychiatry (ISNIP) and the International Society for Brain Electromagnetic Topography (IS-BET), Istanbul, Turkey. Contact: Kemal Arıkan [mkarikan@istanbul.edu.tr](mailto:mkarikan@istanbul.edu.tr) (e-mail) [www.ecns2010.com](http://www.ecns2010.com) (web site).

---

## OCTOBER

**October 14–17**, 62nd Institute on Psychiatric Services, American Psychiatric Association, Boston, MA. Contact: Jill Gruber, APA Annual Meetings Dept., 1000 Wilson Blvd., Ste. 1825, Arlington, VA 22209; (703) 907-7815.

**October 22–24**, International Conference on Schizophrenia: ICONS IV, Chennai, India. Contact: Dr.R.Thara, Director, SCARF INDIA, [scarf@vsnl.com](mailto:scarf@vsnl.com), [info@icons-scarf.org](mailto:info@icons-scarf.org) (e-mail).

**October 26–31**, 57th Annual Meeting of the American Academy of Child and Adolescent Psychiatry, New York, NY. Contact: AACAP, 3615 Wisconsin Avenue, N.W., Washington, DC 20016-3007; (202) 966-7300 (tel), (202) 966-2891 (fax), [meetings@aacap.org](mailto:meetings@aacap.org) (e-mail), [www.aacap.org](http://www.aacap.org) (web site).

---

## MAY 2011

**May 14–19**, 164th Annual Meeting of the American Psychiatric Association, Honolulu, HI. Contact: Cathy Nash, APA Annual Meetings Dept., 1000 Wilson Blvd., Ste. 1825, Arlington, VA 22209; (703) 907-7822.

---

## OCTOBER

**October 5–8**, II International Congress, Dual Disorders, Addictive Behaviors and other Mental Disorders, Barcelona, Spain. Contact: SEPD, [www.cipd2011.com](http://www.cipd2011.com) (web site).

**October 18–23**, 58th Annual Meeting of the American Academy of Child and Adolescent Psychiatry, Toronto, Ontario. Contact: AACAP, 3615 Wisconsin Avenue, N.W., Washington, DC 20016-3007; (202) 966-7300 (tel), (202) 966-2891 (fax), [meetings@aacap.org](mailto:meetings@aacap.org) (e-mail), [www.aacap.org](http://www.aacap.org) (web site).

**October 27–30**, 63rd Institute on Psychiatric Services, American Psychiatric Association, San Francisco, CA. Contact: Jill Gruber, APA Annual Meetings Dept., 1000 Wilson Blvd., Ste. 1825, Arlington, VA 22209; (703) 907-7815.

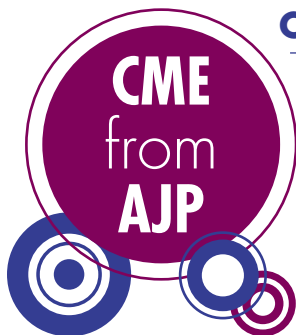

## Continuing Medical Education

Three articles in this issue form the basis of a short course with questions that can be answered for up to 1 *AMA PRA Category 1 Credit™* each by visiting <http://cme.psychiatryonline.org/> and clicking on “American Journal of Psychiatry CME.”

CME credit is issued only online, and a paid subscription to the AJP CME course program is required.

This month’s courses appear on pages 611–614.

**FREE AUDIO!**

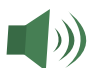

## Have You Heard?

You can listen to highlights of *The American Journal of Psychiatry* by downloading a monthly free .mp3 audio file from our web site (<http://ajp.psychiatryonline.org/misc/audio.dtl>) or by subscribing to the AJP Audio podcast at iTunes or other feed reader (e.g., NewzCrawler, FeedDemon, Bloglines, Google Reader). Presented by Deputy Editor Dr. Susan Schultz or by Editorial Director Michael Roy, each month’s audio lasts approximately 30 minutes and covers several research articles, the Treatment in Psychiatry feature, and one or two editorials.

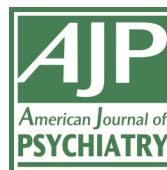

Coming in the June 2010 issue\*

## THE AMERICAN JOURNAL OF PSYCHIATRY

*Time to Attainment of Recovery From Borderline Personality Disorder and Stability of Recovery:  
A 10-year Prospective Follow-Up Study*

M.C. Zanarini, F.R. Frankenburg, D.B. Reich, and G. Fitzmaurice

*A Double-Blind, Placebo-Controlled Trial Combining Sertraline and Naltrexone for Treating Co-Occurring  
Depression and Alcohol Dependence*

H.M. Pettinati, D.W. Oslin, K.M. Kampman, W.D. Dundon, H. Xie, T.L. Gallis, C.A. Dackis, and C.P. O’Brien

*Risperidone Maintenance Treatment in Schizophrenia: A Randomized, Controlled Trial*

C.-Y. Wang, Y.-T. Xiang, Z.-J. Cai, Y.-Z. Weng, Q.-J. Bo, J.-P. Zhao, T.-Q. Liu, G.-H. Wang, S.-M. Weng, H.-Y. Zhang, D.-F. Chen, W.-K. Tang, G.S. Ungvari, For the Risperidone Maintenance Treatment in Schizophrenia (RMTS) investigators

*International Consensus Study of Antipsychotic Dosing*

D.M. Gardner, A.L. Murphy, H. O’Donnell, F. Centorrino, and R.J. Baldessarini

\*Can’t wait? Visit [ajp.psychiatryonline.org](http://ajp.psychiatryonline.org) and click the “AJP in Advance” logo to see all articles uploaded in advance of print!

- A15 Editorial Board  
A17 Highlights of this issue

**Editorials**

- 339 Early specialised treatment for first-episode psychosis: does it make a difference?  
S. Friis  
341 An effective intervention delivered at sub-therapeutic dose becomes an ineffective intervention  
E. Latimer

**Reappraisal**

- 343 Early intervention in psychosis  
S.P. Singh

**Review article**

- 346 Efficacy and safety of bupropion for smoking cessation and reduction in schizophrenia: systematic review and meta-analysis  
D.T. Tsoi, M. Porwal, and A.C. Webster  
353 From patient to service user – in 100 words  
David Brunskill

**Papers**

- 354 Toxicity of antidepressants: rates of suicide relative to prescribing and non-fatal overdose  
K. Hawton, H. Bergen, S. Simkin, J. Cooper, K. Waters, D. Gunnell, and N. Kapur  
359 Effect of 11 September 2001 terrorist attacks in the USA on suicide in areas surrounding the crash sites  
C.A. Claassen, T. Carmody, S.M. Stewart, R.M. Bossarte, G.L. Larkin, W.A. Woodward, and M.H. Trivedi  
365 From depressive symptoms to depressive disorders: the relevance of thresholds  
J.L. Ayuso-Mateos, R. Nuevo, E. Verdes, N. Naidoo, and S. Chatterji  
372 Effect of early intervention on 5-year outcome in non-affective psychosis  
R. Gafoor, D. Nitsch, P. McCrone, T.K.J. Craig, P.A. Garety, P. Power, and P. McGuire  
376 Ian Curtis – psychiatry in pictures  
Geoff Dickens and Marco Picchioni

- 377 Cost-effectiveness of an early intervention service for people with psychosis  
P. McCrone, T.K.J. Craig, P. Power, and P.A. Garety  
383 Group-based psychosocial intervention for bipolar disorder: randomised controlled trial  
D. Castle, C. White, J. Chamberlain, M. Berk, L. Berk, S. Lauder, G. Murray, I. Schweitzer, L. Piterman, and M. Gilbert  
389 Transference-focused psychotherapy v. treatment by community psychotherapists for borderline personality disorder: randomised controlled trial  
S. Doering, S. Hörz, M. Rentrop, M. Fischer-Kern, P. Schuster, C. Benecke, A. Buchheim, P. Martius, and P. Buchheim  
396 Cost-effectiveness of psychotherapy for cluster B personality disorders  
D.I. Soeteman, R. Verheul, J. Delimon, A.M.M.A. Meerman, E. van den Eijnden, B.V. Rossum, U. Ziegler, M. Thunnissen, J.J.V. Busschbach, and J.J. Kim  
404 Supported employment: randomised controlled trial  
L.M. Howard, M. Heslin, M. Leese, P. McCrone, C. Rice, M. Jarrett, T. Spokes, P. Huxley, and G. Thornicroft  
411 Now this won't hurt a bit – psychiatry in the movies  
Peter Byrne

**Short report**

- 412 Auditory hallucinations and brain structure in schizophrenia: voxel-based morphometric study  
I. Nenadic, S. Smesny, R.G.M. Schlösser, H. Sauer, and C. Gaser

**Columns**

- 414 Correspondence  
417 Corrections  
417 Music Swims Back to Me – poem  
Anne Sexton  
418 Book reviews  
420 Contents of *Advances in Psychiatric Treatment*  
421 Contents of the *American Journal of Psychiatry*  
422 From the Editor's desk

# get CME from AJP

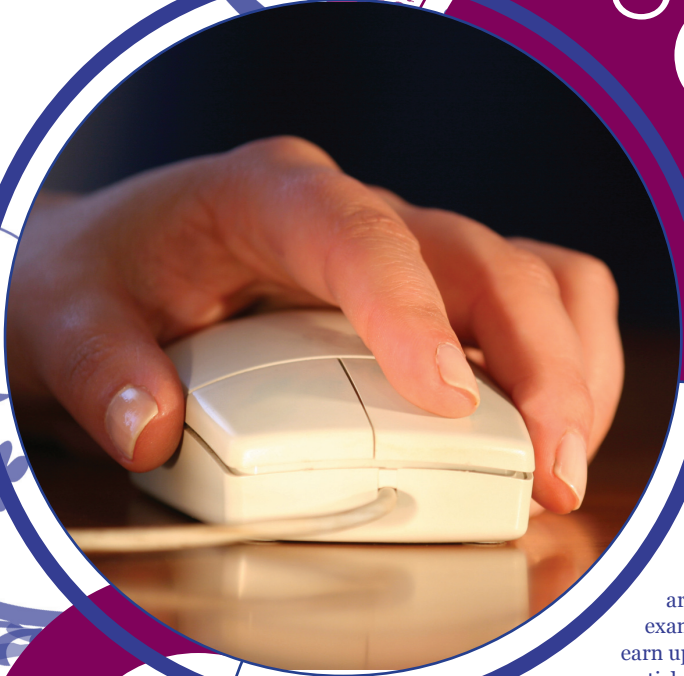

Brief companion exams are created for three of the most influential articles from each issue. By reading the articles and completing the online exams, you can test your knowledge and earn up to 1 *AMA PRA Category 1 Credit*<sup>™</sup> per article. Correct answers are highlighted for your reference upon completion of the course; there is no minimum threshold score necessary for the credit. A

link from the question to the correct answer in context will also be highlighted in the associated article, thus extending the learning experience.

CME credit is only provided online, and a subscription to the AJP CME program is required. From the moment you subscribe to the AJP CME program, you will be able to select from 72 courses from among 40 possible subject areas. You'll also be able to access the next 33 courses as they become available. For more information and pricing, please go to <http://cme.psychiatryonline.org/misc/aboutajpcme.shtml>

This activity is sponsored by the American Psychiatric Association. The American Psychiatric Association is accredited by the Accreditation Council for Continuing Medical Education to provide continuing medical education for physicians. The American Psychiatric Association designates each educational activity for a maximum of 1 *AMA PRA Category 1 Credit*<sup>™</sup>. Physicians should only claim credit commensurate with the extent of their participation in the activity.

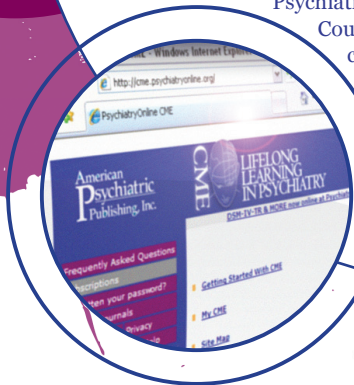

Fulfill your CME requirement while staying current on the latest advances in psychiatry.  
Subscribe to AJP CME!
