# THE AMERICAN JOURNAL OF PSYCHIATRY

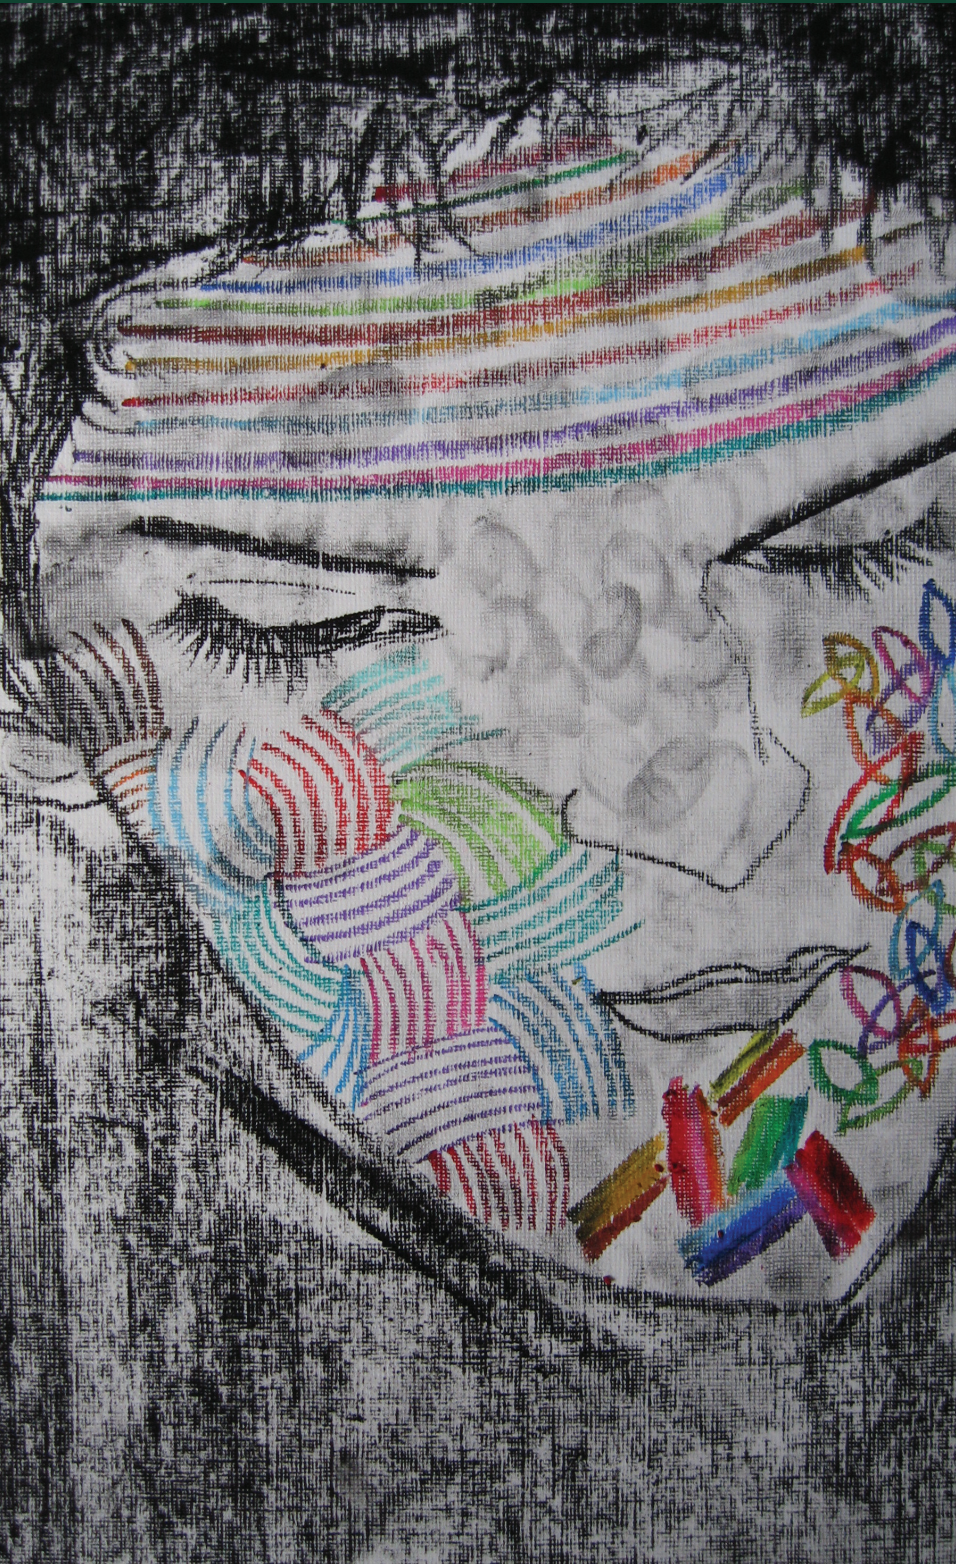

- ◀ **Personality Disorders in the Depressed: Seeing Clearly Through Blue Lenses**  
Robert Michels, M.D. 487
  
- ◀ **State Effects of Major Depression on the Assessment of Personality and Personality Disorder**  
Leslie C. Morey, Ph.D., et al. 528
  
- Genetic Sensitivity to the Environment: The Case of the Serotonin Transporter Gene and Its Implications for Studying Complex Diseases and Traits**  
Avshalom Caspi, Ph.D., et al. 509
  
- ◀ **Depressive Disorder and Incident Diabetes Mellitus: The Effect of Characteristics of Depression**  
Antonio Campayo, M.D., et al. 580
  
- Continuing Medical Education 611**

May 2010

Volume 167 • Number 5

---

Official Journal of the  
AMERICAN PSYCHIATRIC ASSOCIATION

---

[ajp.psychiatryonline.org](http://ajp.psychiatryonline.org)
